# Supplementary material for: Comprehensive assessment of permafrost carbon emissions indicates need for urgent action to keep Paris Agreement temperature goals within reach
Source: Research Square preprint supplement (doi:10.21203/rs.3.rs-3909244/v1), 2024-01-30
Supplement: Supplementary file 1 [file ca1350388723768c05d94b62.pdf]

1 **Comprehensive assessment of permafrost carbon emissions indicates**  
2 **need for urgent action to keep Paris Agreement temperature goals**  
3 **within reach**

4

## 5 **SUPPLEMENTARY INFORMATION**

6

7 Rachael Treharne, Thomas Gasser, Brendan M. Rogers, Merritt R. Turetsky, Christina Schaedel,  
8 Erin MacDonald, Susan Natali

9

10 **Section S1: Emissions budgets**

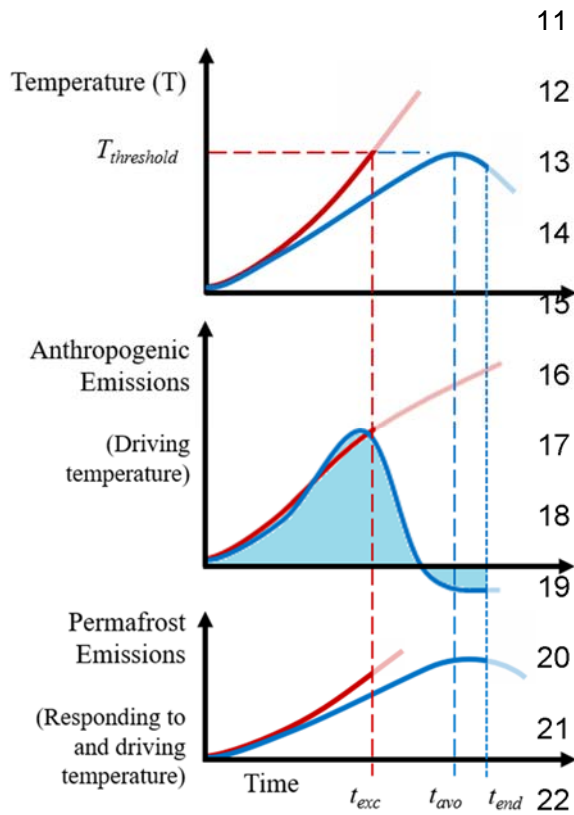

23 **Figure S1.1:** Modified from Gasser et al., 2018. Conceptual figure illustrating the exceedance  
24 and avoidance budget calculation approaches. Exceedance budgets (red) are the amount of CO<sub>2</sub>  
25 that can be emitted before exceeding a given temperature threshold. Avoidance budgets (blue)  
26 are the amount of CO<sub>2</sub> that can be emitted while staying below the target.  $t_{exc}$  indicates the time  
27 at which a specified temperature threshold is exceeded (for exceedance budgets);  $t_{avo}$  indicates  
28 a temperature peak at the same threshold, in line with a conceptualized avoidance scenario.  $t_{end}$   
29 indicates the end of the conceptualized avoidance scenario, beyond which further temperature  
30 change is not considered in the corresponding budget calculation. Permafrost emissions are not  
31 directly used to calculate emissions budgets, but are included here for comparison. See sections  
32 S1.1 and S1.2 for full explanation.

33

34 **S1.1 Avoidance budgets**

35 Avoidance budgets are the maximum amount of CO<sub>2</sub> that can be emitted while temperatures  
36 remain below the specified temperature threshold for the duration of the modeled scenario. To  
37 ensure temperatures genuinely remained below the specified threshold, each simulation set  
38 (Table 1) was run across a range of pathways under which fossil fuel CO<sub>2</sub> emissions reach a peak  
39 and subsequently decline. These 'peak and decline' scenarios were obtained by updating the  
40 fossil fuel CO<sub>2</sub> emission pathways described in Gasser et al., (2018) to align the historical period

41 and the historical growth rate of CO<sub>2</sub> emissions with the global Shared Socioeconomic Pathways  
42 (SSP) data (Meinshausen et al., 2020).

43 In order to maximize the number of simulations with maximum temperatures within +0.5°C of the  
44 specified temperature target, K means clustering was used on an initial set of simulations run  
45 across 520 CO<sub>2</sub> emission pathways to select a subset of 176 pathways which were paired with  
46 161 Monte Carlo configurations from a scheme of 500.

47

## 48 S1.2 Exceedance budgets

49 An exceedance budget is the amount of CO<sub>2</sub> that is emitted before the specified temperature  
50 threshold is exceeded ( $t_{exc}$ , Fig S1). This type of emissions budget does not consider temperature  
51 or temperature drivers (including anthropogenic emissions and earth system feedbacks such as  
52 permafrost emissions) subsequent to  $t_{exc}$ . Exceedance scenarios are also less aligned with the  
53 framing of the Paris Agreement goals, and are therefore used here as a supporting analysis only.

54 To calculate exceedance budgets, each simulation set (Table 1) was run using a Monte Carlo  
55 scheme of 500. The Exceedance budget for each simulation was calculated as the cumulative  
56 anthropogenic CO<sub>2</sub> emitted up to the year when additional warming exceeded the specified  
57 temperature target.

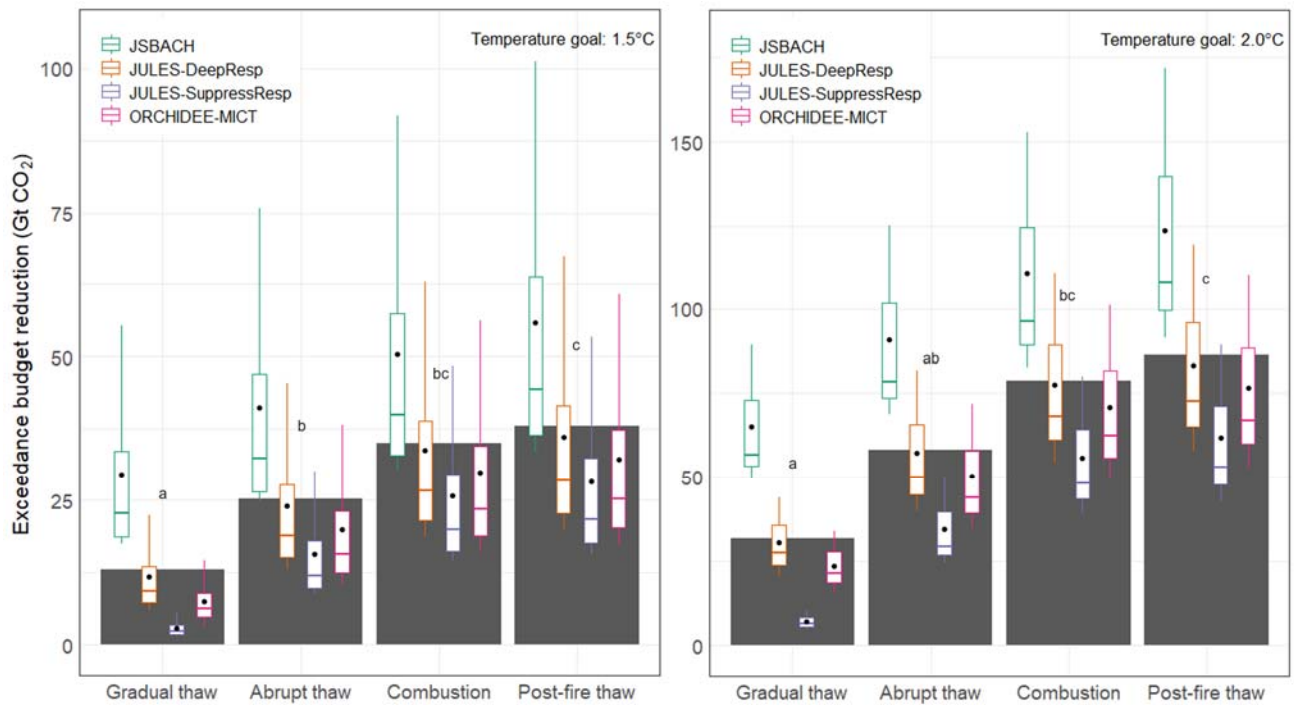

58

59 **Figure S1.2:** Reductions (Gt CO<sub>2</sub>) in remaining exceedance budgets for the 1.5°C (left) and 2.0°C  
60 (right) temperature goals. The absolute value of the budgets ranged from 449 Gt CO<sub>2</sub> to 675 Gt  
61 CO<sub>2</sub> for the 1.5°C threshold, and from 1346 Gt CO<sub>2</sub> to 1716 Gt CO<sub>2</sub> for the 2.0°C threshold (Table  
62 S3). Box plots show results for each of the 4 LSMS (black circles indicate the mean value for

63 each LSM), and gray bars represent mean reduction for all 4 LSMs. Annotation of bars with  
64 different/matching letters indicates statistically significant differences/lack thereof between those  
65 bars ( $p < 0.05$ ). Processes are incorporated into model configurations in a stepwise manner,  
66 meaning (for example) the abrupt thaw configuration also includes gradual thaw.

67

### 68 **S1.3 Observed temperature change during a recent baseline period**

69 We used HadCRUT5 to establish a baseline of  $1.138^{\circ}\text{C}$  of global average temperature increase  
70 during the 2012-2021 period (Morice et al., in press). This means we calculated carbon budgets  
71 associated with exceeding (section 5.2) or avoiding (section 5.3) an additional  $0.362^{\circ}\text{C}$  (for  $1.5^{\circ}\text{C}$   
72 threshold) or  $0.862^{\circ}\text{C}$  (for  $2^{\circ}\text{C}$  threshold) of global average temperature increase.

73

74

75 **Section S2: Temperature response of total burned area**

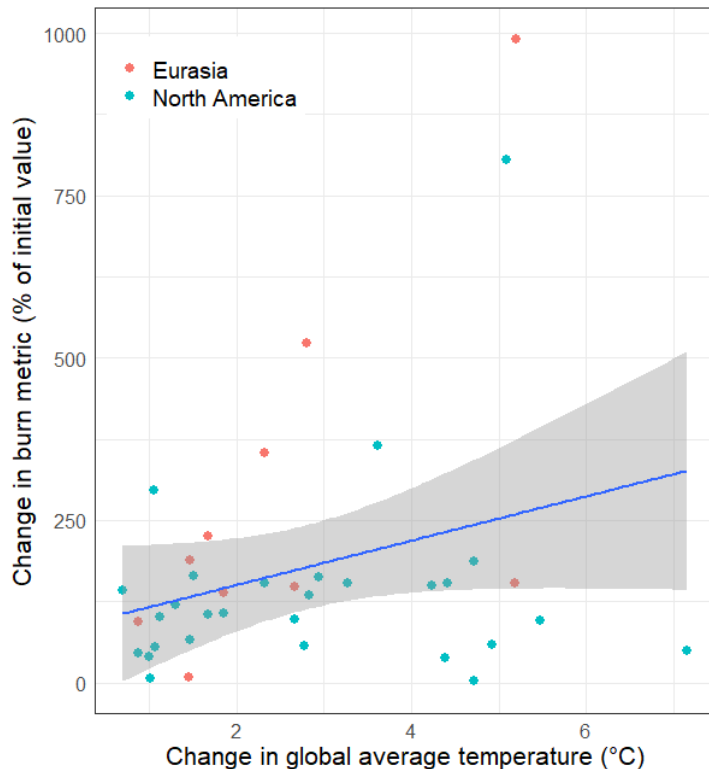

76

77 **Figure S2.1:** Projections of change in burn metric (burned area, carbon emissions or fire  
78 frequency) with change in global average temperature for the North American or Eurasian boreal  
79 and/or tundra regions, with linear regression ( $y=34*x + 83$ ;  $F=3.099$ ,  $DF=1,36$ ,  $p=0.087$ ). Each  
80 point represents a specific climate scenario. Data obtained through systematic literature review.

81

82 **S2.1 Systematic literature review for projection of change in burned area**

83

84 We sought projections of change in burned area, carbon emissions or fire frequency for the North  
85 American, Eurasian, or pan-Arctic boreal and/or tundra regions. Our selection process was based  
86 on the following criteria: the paper included a projected fire metric (burned area, carbon  
87 emissions, or fire frequency were accepted, but weather-based fire metrics such as the Canadian  
88 Fire Weather Indices were not) for any year from 2060 to 2100. We excluded any papers that had  
89 a sub-regional domain ( $< \sim 100,000 \text{ km}^2$ ). Our final criterion was that the paper included the  
90 corresponding change in global mean temperature or, where temperature change was not  
91 explicitly included, enough information about the Global Climate Model and emissions scenario  
92 used to retrieve temperature change information for the corresponding time periods. We did not  
93 include any papers that manipulated burned area as a factor, nor any that used the same input  
94 data as a paper that was already included (as this would result in replicate projections). Our final  
95 analysis included 8 papers for North America (Boulanger et al. 2018; Genet et al. 2018; Pastick  
96 et al. 2017; Boulanger et al. 2014; Genet et al. 2013; Balshi et al. 2009; Euskirchen et al. 2009;

97 Bachelet et al. 2005), 2 papers for Eurasia (Kicklighter et al. 2014; Dixon & Krankina, 1993), and  
98 2 papers which included both (pan-Arctic; Eliseev et al. 2014; Kloster et al. 2012).  
99 Because many papers included either multiple regions or multiple Global Climate Models, we  
100 weighted estimates so that each paper would have a total weight of one (e.g., if a paper used two  
101 Global Climate Models, each estimate was given a weight of 0.5 in the calculation of the final  
102 average) to determine our final weighted average of a 0.7517 increase in burn metric °C<sup>-1</sup> of  
103 warming. As this linear temperature response did not differ significantly between North America  
104 and Eurasia (p=0.069), a single response was used within the model (fig S2.1).

105  
106

## 107 **S2.2 Compensating for increased post-fire NPP**

108 We compensated for increased post-fire NPP by increasing CO<sub>2</sub> uptake relative to emission  
109 losses during a set post-fire recovery interval, parameterized based on crown fires in boreal North  
110 America.

111 Fire results in a short-term loss of NPP, followed by a period of increased carbon sequestration  
112 as vegetation recovers (Goulden et al., 2011; Randerson et al., 2006). This recovery period  
113 begins about 10 years after fire and continues on the timescale of years to decades until the  
114 ecosystem reaches a stable successional state, by which point NPP declines to approximately  
115 pre-fire levels. This post-fire carbon sink was parameterized to remove a volume of CO<sub>2</sub>  
116 equivalent to 100% of that emitted by fire at a rate subject to exponential decay during a  
117 conservative fire return interval of 150 years. This 100% 'offset' of combustion emissions by  
118 enhanced post-fire CO<sub>2</sub> uptake is a typical response of boreal forests following fire (Goulden et  
119 al., 2011), and is therefore a realistic assumption in at least some forested permafrost regions.  
120 However, in some tundra regions, even NPP of early successional communities is low when  
121 compared to the soil carbon stocks vulnerable to combustion (Madani et al., 2021; Loranty et al.,  
122 2014; Mack et al., 2011). Carbon emitted during tundra fire is therefore unlikely to be fully  
123 compensated for during recovery, meaning that our estimate of net emissions from tundra fires is  
124 likely conservative.

125

126

128

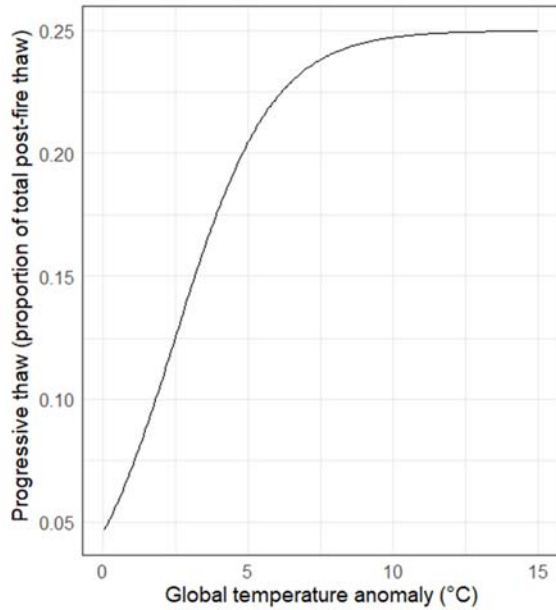

**Figure S3.1:** Temperature response function applied to remaining burned area (i.e. total burned area, less that affected by post-fire abrupt thaw) to obtain an annual proportion of that area affected by post-fire progressive thaw (methods section 4.2).

145

147

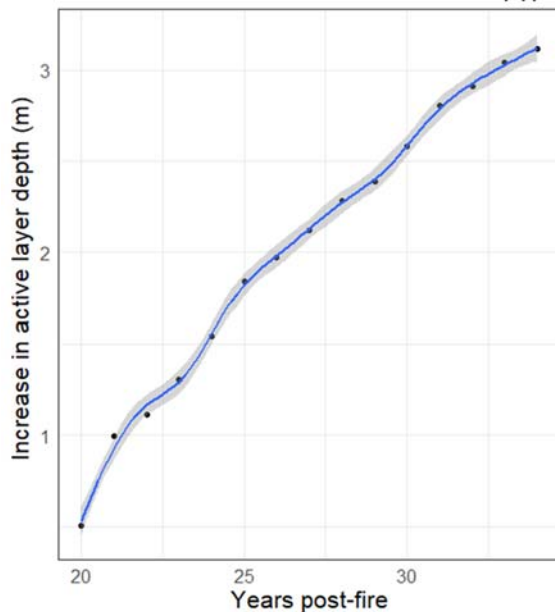

**Figure S3.2:** Modeled increase in active layer depth following fire in upland boreal forest with dynamic organic soil recovery. Data extracted from Jafarov et al., (2013) and used to estimate the time period for progressive thaw of near-surface (upper 3m) permafrost (methods section 4.2). Estimate made using a General Additive Model (blue line).

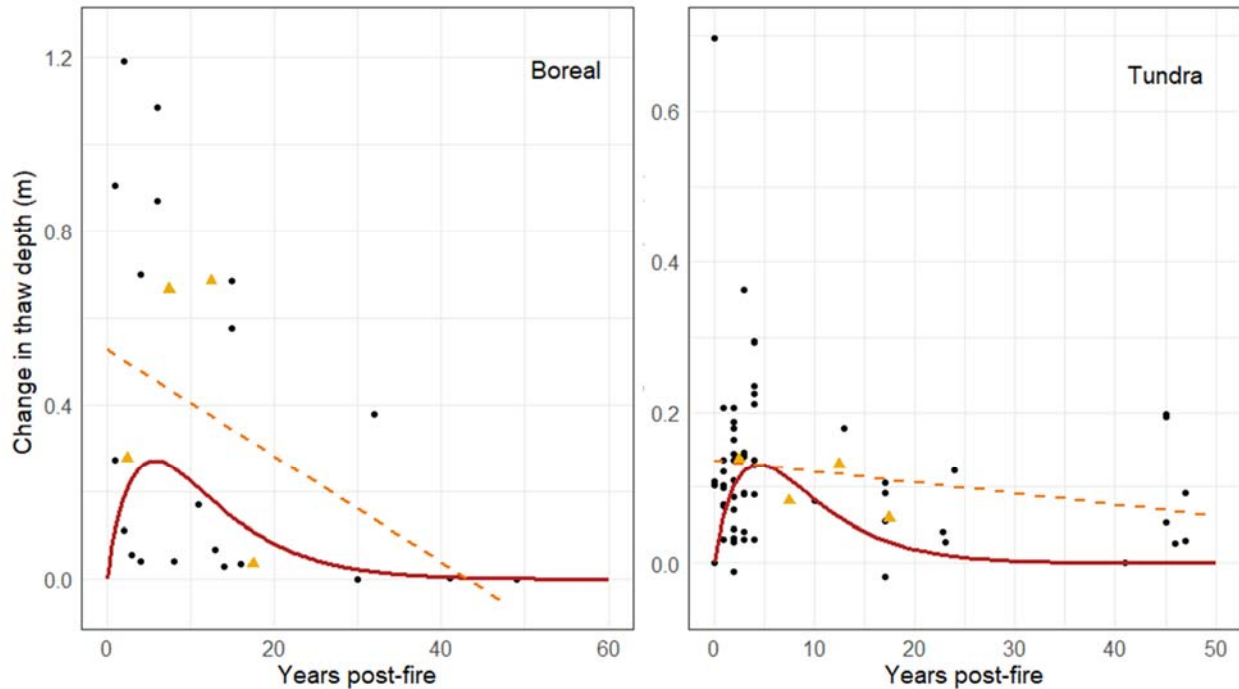

162  
 163 **Figure S3.3:** Temporary change in active layer depth following fire in tundra (left) and boreal  
 164 (right) biomes. Points represent observational data obtained by systematic literature review  
 165 (methods section 4.4). Red lines show the trajectories of change in active layer depth under  
 166 temporary post-fire thaw. Thaw trajectories were informed by observation data and fitted to meet  
 167 additional criteria; increase in active layer to peak within 10 years of fire; change in active layer  
 168 depth must decline to 0 within 50 years of fire; trajectory curve must integrate to a value less than  
 169 or equal to the corresponding linear regression during the first five years post-fire. For ease of  
 170 interpretation, golden triangles show 5-year averages and dashed orange lines show linear  
 171 regression

172  
 173

### 174 **S3.1 Post-fire progressive and temporary thaw emissions**

175 Emissions associated with both progressive and transient post-fire thaw were calculated following  
 176 the approach of the gradual thaw permafrost carbon emulator. In brief, the quantities of thawed  
 177 permafrost carbon, which are output from progressive and transient thaw processes, are split  
 178 between up to three carbon pools, following the parameterization of the gradual thaw module  
 179 according to the specified LSM configuration. Each of these pools is subjected to heterotrophic  
 180 respiration with its own turnover time, and subsequently converted to CO<sub>2</sub> and CH<sub>4</sub> emissions,  
 181 with the proportion of carbon emitted as CH<sub>4</sub> set at 2.3% (see Gasser et al., 2018 for more detail).

182

183

184

185

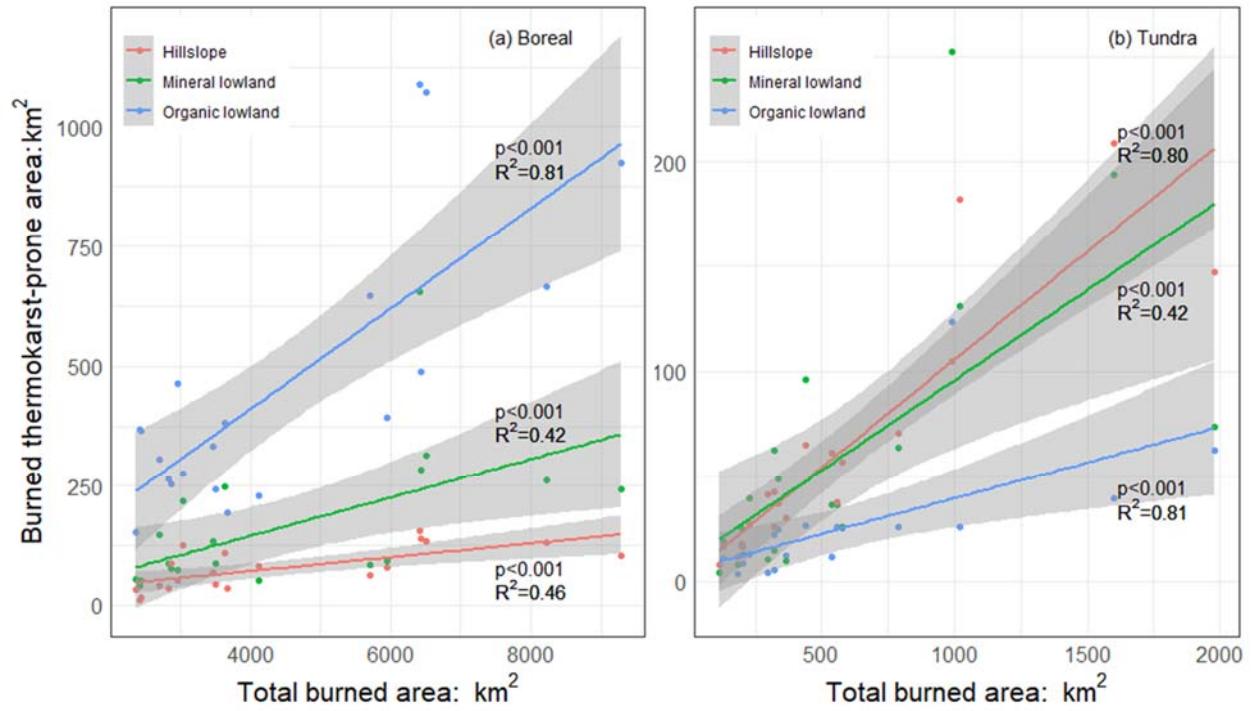

187  
 188 **Figure S4.1:** Linear correlations between total annual burned area across the (a) boreal and (b)  
 189 tundra biomes, and annual burned thermokarst-prone area in each biome and in different  
 190 landscape types from 1997-2016. Data obtained using van der Werf et al., 2017 and Olefeldt et  
 191 al., 2016.

192  
 193

194 **Section 5: Permafrost and fire related emissions**  
195

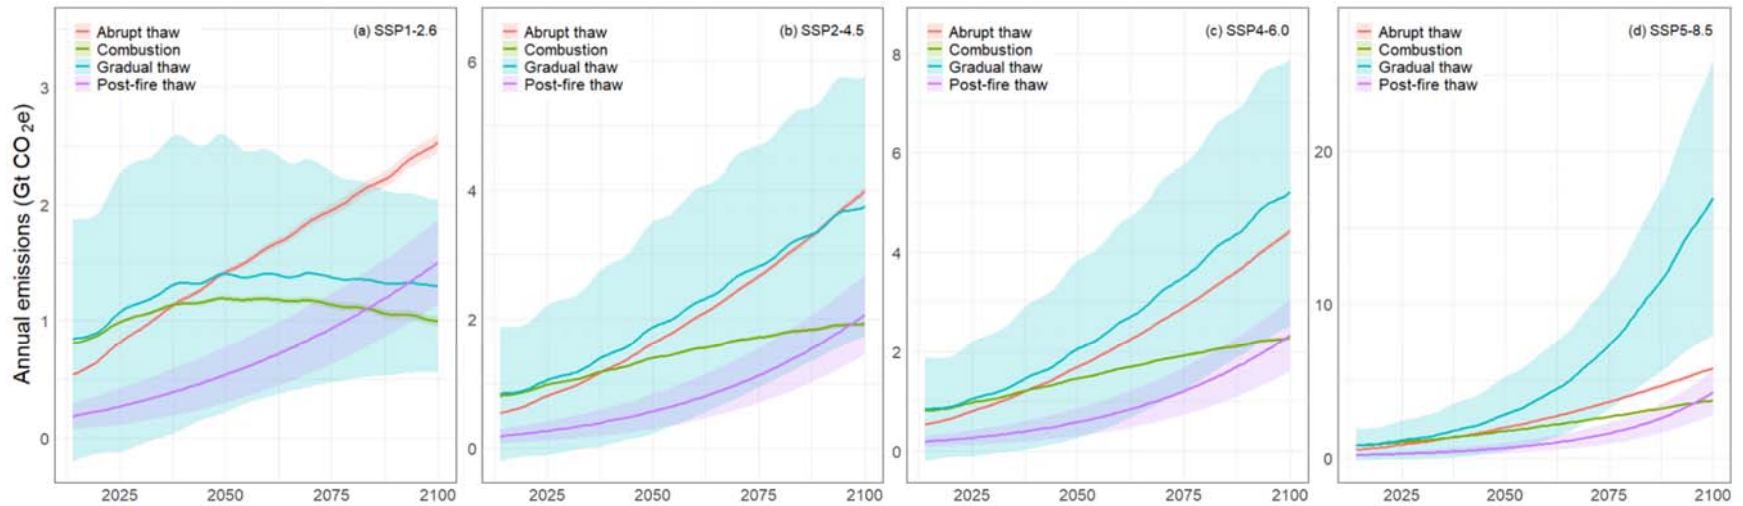

196  
197 **Figure S5.1:** Total annual CO<sub>2</sub> and CH<sub>4</sub> emissions (GtCO<sub>2</sub>e) under different SSP-RCP scenarios (left to right, high to low mitigation  
198 effort) originating from different processes modeled within OSCAR (line colors) from 2014 to 2100. Confidence intervals represent 1  
199 standard deviation.

200  
201  
202

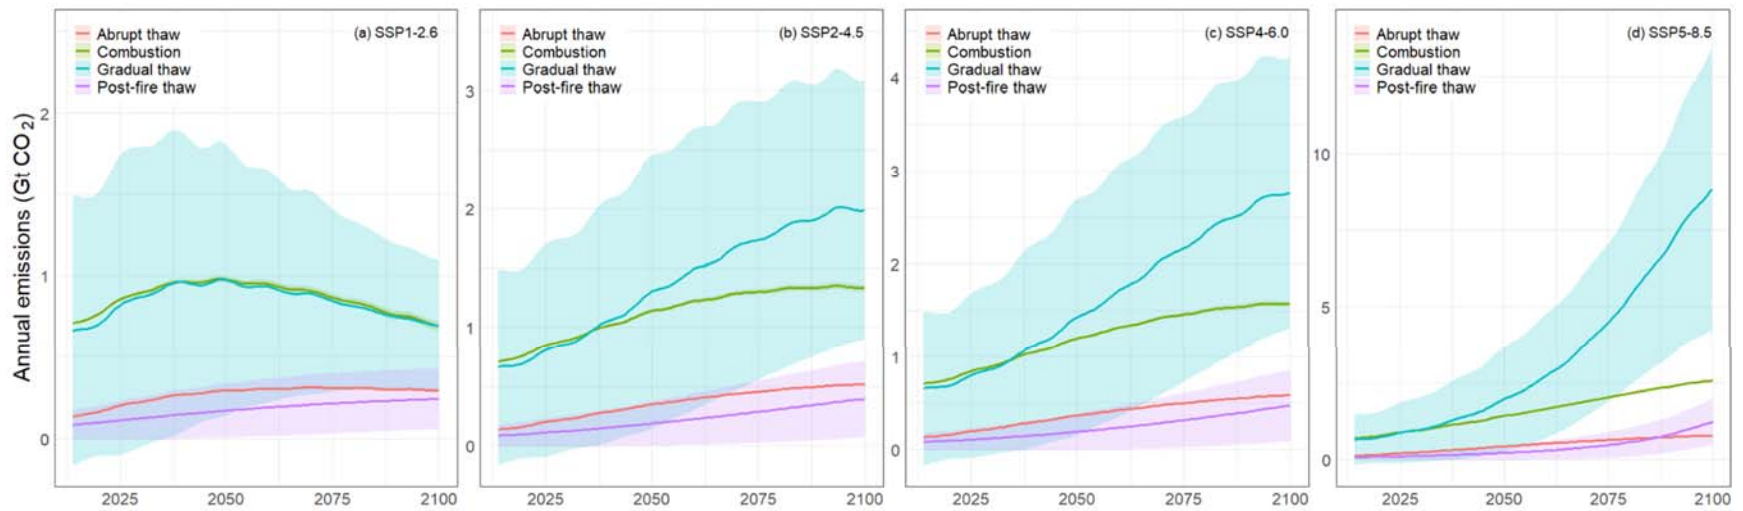

203  
 204 **Figure S5.2:** Total annual CO<sub>2</sub> emissions (GtCO<sub>2</sub>) under different SSP-RCP scenarios (left to right, high to low mitigation effort)  
 205 originating from different processes modeled within OSCAR (line colors) from 2014 to 2100. Confidence intervals represent 1 standard  
 206 deviation.  
 207

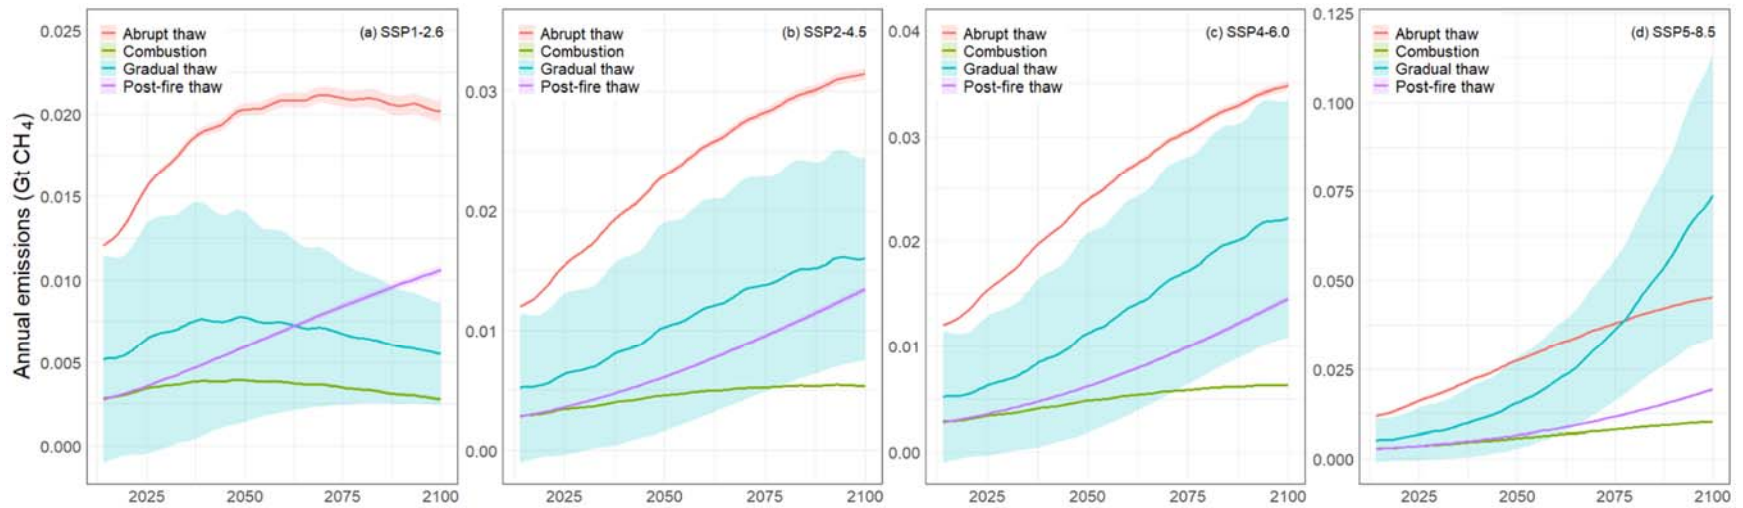

208

209 **Figure S5.3:** Total annual CH<sub>4</sub> emissions (GtCH<sub>4</sub>) under different SSP-RCP scenarios (left to right, high to low mitigation effort)  
 210 originating from different processes modeled within OSCAR (line colors) from 2014 to 2100. Confidence intervals represent 1 standard  
 211 deviation.

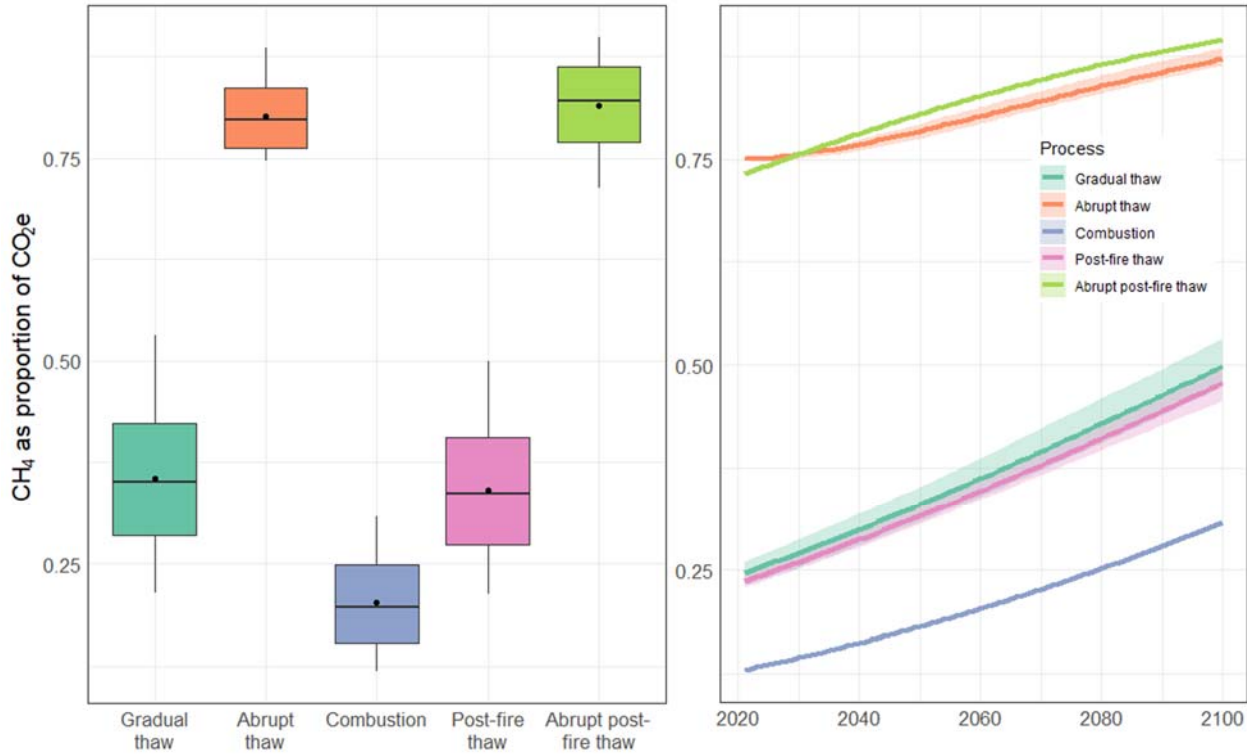

212 **Figure 5.4:** The proportion of CO<sub>2</sub>e accounted for by CH<sub>4</sub>, as a 2021-2100 average (left) and over time (right). Shaded areas on the  
 213 right indicate the range of values across LSMs and SSP-RCP scenarios, while solid lines denote mean values. CO<sub>2</sub>e is based on  
 214 Global Warming Potential from the year of emission to 2100. Note that CH<sub>4</sub> therefore accounts for a substantially higher proportion of  
 215 CO<sub>2</sub>e than of carbon (C) emissions, due to the higher GWP of CH<sub>4</sub> that is used to calculate CO<sub>2</sub>e. Also note that, by nature, CH<sub>4</sub>'s  
 216 contribution to CO<sub>2</sub>e is higher at the end of the century due to its shorter atmospheric lifetime.  
 217  
 218

219

220 **Figure S6:** Annual total area affected by different stages of abrupt thaw (undisturbed area, active thaw, intermediate or stabilized thaw  
221 features, and final stage or mature thaw features), estimated using the new abrupt thaw module in OSCAR (top), and the models  
222 reported in Turetsky et al. (2020) (bottom) under SSP5-RCP8.5. Line colors indicate landscape type, following Turetsky et al. (2020).

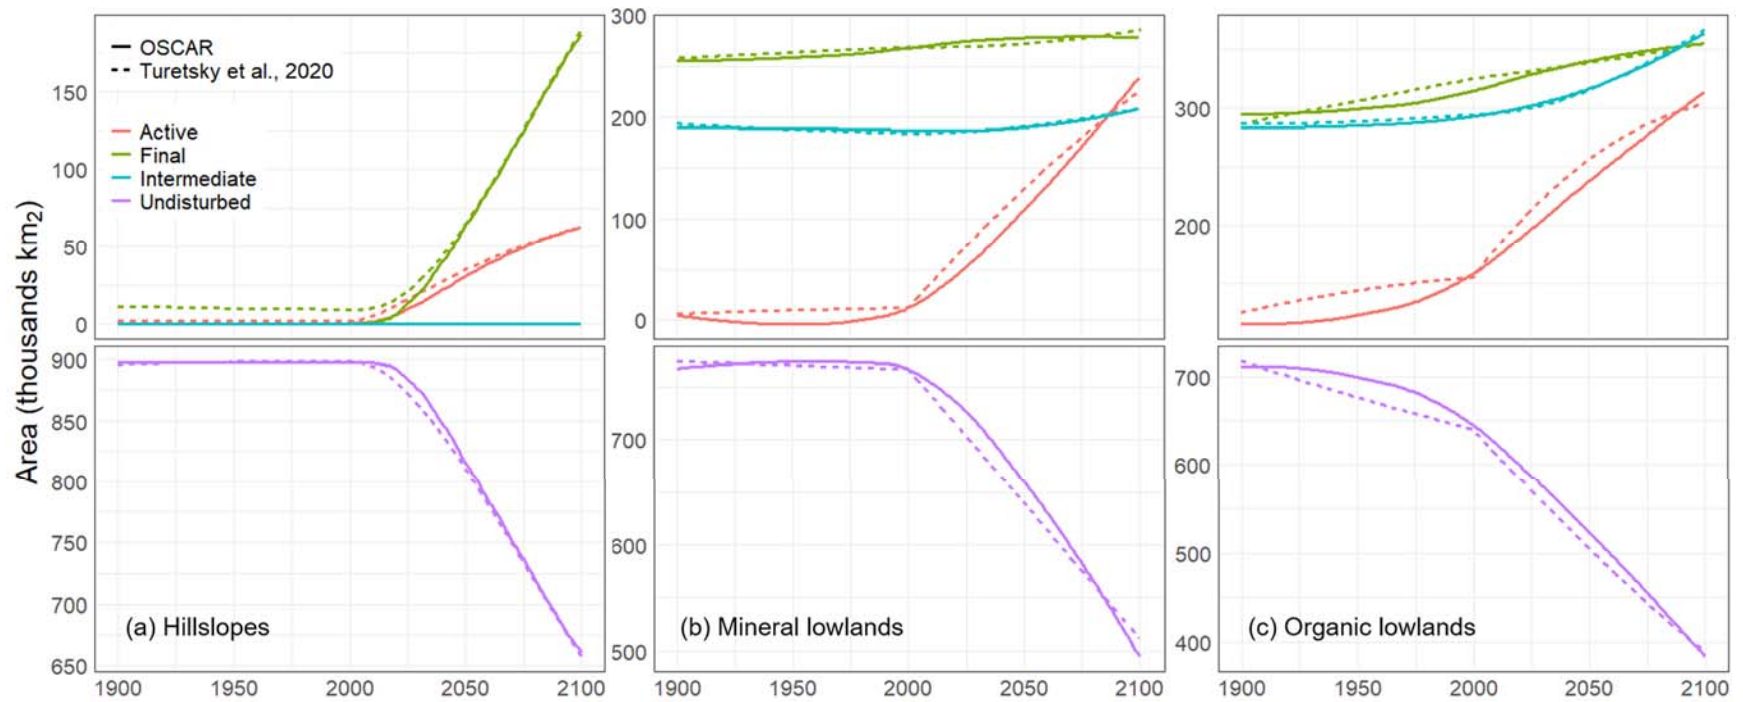

223

224 **Table S1:** Observational data obtained through literature searches for (a) fire impacts on active layer thickness and (b) fire impacts on ground  
 225 temperature in boreal and tundra regions and used for post-fire permafrost thaw processes. Data were supplemented by unpublished datasets.

| Reference                  | Biome  | Years since fire | Active Layer Thickness                             |                     |                     | Ground temperature                                 |                     |                     |                           |
|----------------------------|--------|------------------|----------------------------------------------------|---------------------|---------------------|----------------------------------------------------|---------------------|---------------------|---------------------------|
|                            |        |                  | Change (cm)<br>Mean or single reported measurement | Minimum change (cm) | Maximum change (cm) | Change (°C)<br>Mean or single reported measurement | Minimum change (°C) | Maximum change (°C) | Depth of measurement (cm) |
| Li et al., 2018            | Boreal | 1-30             | 92.50                                              | 20.00               | 300.00              | 1.45                                               | -0.20               | 2.63                | 100                       |
| Nossov et al., 2013        |        | 1-4              | 68.00                                              | 51.00               | 87.00               | 2.20                                               | 1.50                | 3.00                | 100                       |
| Gibson et al., 2018        |        | 2-49             | 2.99                                               | -0.09               | 8.21                | 4.88                                               | 1.03                | 7.55                | 40                        |
| Fisher et al., 2016        |        | 6                | 79.30                                              |                     |                     |                                                    |                     |                     |                           |
| Zhang et al., 2015         |        | 6                | 63.50                                              |                     |                     |                                                    |                     |                     |                           |
| Jiang et al., 2015         |        | 4                |                                                    |                     |                     | 5.13                                               | 4.94                | 5.32                | 20                        |
| Kasichke & Johnstone 2005  |        | 1-10             |                                                    |                     |                     | 9.47                                               | 6.64                | 11.45               | 20                        |
| Jafarov et al., 2013       |        |                  |                                                    |                     |                     |                                                    | 0.00                | 2.20                | 100                       |
| Alexander et al., 2018     |        | 1                | 16.61                                              | 6.89                | 28.15               | 1.51                                               | 0.27                | 2.60                | 5                         |
| Burn, 1998                 |        | 24               |                                                    |                     |                     | 3.69                                               |                     |                     | 20                        |
| Williams et al., 2020      |        | 6                |                                                    |                     |                     | 1.14                                               |                     |                     | 22                        |
| Natali et al., unpublished |        | 11-32            | 17.82                                              | 2.05                | 41.94               |                                                    |                     |                     |                           |
| Rocha & Shaver 2011        |        | Tundra           | 1-3                                                | 9.88                | 6.36                | 15.08                                              |                     | 1.50                | 4.00                      |
| Rocha & Shaver 2011b       | 1      |                  |                                                    |                     |                     | 3.87                                               | 1.87                | 5.44                | 8                         |
| Rocha et al., 2012         | 10     |                  | 6.00                                               |                     |                     |                                                    |                     |                     |                           |
| Hall et al., 1978          | 1      |                  | 8.90                                               |                     |                     |                                                    |                     |                     |                           |
| Wein & Bliss 1973          | 1-2    |                  | 10.25                                              | 8.00                | 13.00               |                                                    |                     |                     |                           |
| Liljedahl et al., 2007     | 1-4    |                  | 16.39                                              | 5.63                | 26.49               | 1.20                                               |                     |                     | 100                       |
| Oechel, 1999               | 2-23   |                  | 3.34                                               | -0.87               | 9.43                |                                                    |                     |                     |                           |
| Fetcher et al., 1984       | 13     |                  | 13.00                                              |                     |                     |                                                    |                     |                     |                           |
| Vavrek et al., 1999        | 24     |                  | 9.00                                               |                     |                     |                                                    |                     |                     |                           |
| Patterson & Dennis 1981    | 2      |                  | 15.00                                              |                     |                     |                                                    |                     |                     |                           |
| Barret et al., 2012        | 17     |                  | 7.73                                               |                     |                     |                                                    |                     |                     |                           |
| Barret et al., 2012        | 17     |                  | 4.06                                               |                     |                     |                                                    |                     |                     |                           |
| Loranty et al., 2014       | 41     |                  | 0.00                                               |                     |                     |                                                    |                     |                     |                           |
| Jiang et al., 2015         | 1      |                  |                                                    |                     |                     | 2.28                                               | 1.32                | 3.33                | 20                        |
| Natali et al., unpublished | 1-47   |                  | 9.58                                               | 0.10                | 50.80               |                                                    |                     |                     |                           |

227 **Table S2:** Data obtained through literature search used to calculate a ratio of change in  
 228 ground subsidence to active layer depth, weighted by study to account for the use of multiple  
 229 data points from some studies. The weighted average ratio was 0.39 (range: 0.06-2.77,  
 230 standard deviation 0.59).

| Reference                | Biome  | Years since fire | Ground subsidence (cm) | Change in Active Layer Depth (ALD; cm) | Ratio (Ground subsidence / Change in ALD) | Weighting |
|--------------------------|--------|------------------|------------------------|----------------------------------------|-------------------------------------------|-----------|
| Mackay, 1995             | Tundra | 11               | 5                      | 10                                     | 0.5                                       | 0.125     |
|                          |        | 5                | 18                     | 37                                     | 0.49                                      | 0.125     |
|                          |        | 20               | 39                     | 77                                     | 0.51                                      | 0.125     |
|                          |        | 20               | 39                     | 78                                     | 0.5                                       | 0.125     |
|                          |        | 13               | 9                      | 17                                     | 0.53                                      | 0.125     |
|                          |        | 13               | 16                     | 32                                     | 0.5                                       | 0.125     |
|                          |        | 11               | 10                     | 20                                     | 0.5                                       | 0.125     |
|                          |        | 11               | 17                     | 34                                     | 0.5                                       | 0.125     |
|                          |        | NA               |                        |                                        | 0.33                                      | 1         |
|                          | Boreal | 2                | 9                      | 41                                     | 0.22                                      | 1         |
| Wagner et al., 2018      | Boreal |                  | 10                     | 100                                    | 0.1                                       | 1         |
| Michaelides et al., 2019 | Tundra | 9                | NA                     | NA                                     | 0.2                                       | 1         |
| Rodenhizer et al., 2020  | Tundra | 9                | 89.2                   | 92.4                                   | 0.97                                      | 0.5       |
|                          |        | 9                | 10.8                   | 74.5                                   | 0.14                                      | 0.5       |
| Antonova et al., 2018    | Tundra | <=1              | 3.6                    | 1.3                                    | 2.77                                      | 0.0625    |
|                          |        | <=1              | 2.7                    | 1.5                                    | 1.8                                       | 0.0625    |
|                          |        | <=1              | 2.9                    | 2.5                                    | 1.16                                      | 0.0625    |
|                          |        | <=1              | 2.5                    | 2                                      | 1.25                                      | 0.0625    |
|                          |        | <=1              | 1.8                    | 1.3                                    | 1.38                                      | 0.0625    |
|                          |        | <=1              | 1.6                    | 1                                      | 1.6                                       | 0.0625    |
|                          |        | <=1              | 1.1                    | 2                                      | 0.55                                      | 0.0625    |
|                          |        | <=1              | 0.7                    | 3.7                                    | 0.19                                      | 0.0625    |
|                          |        | <=1              | 0.3                    | 5                                      | 0.06                                      | 0.0625    |
|                          |        | <=1              | 1.6                    | 5                                      | 0.32                                      | 0.0625    |
|                          |        | <=1              | 1.8                    | 4.2                                    | 0.43                                      | 0.0625    |
|                          |        | <=1              | 2                      | 4                                      | 0.5                                       | 0.0625    |
|                          |        | <=1              | 2.5                    | 5.2                                    | 0.48                                      | 0.0625    |
|                          |        | <=1              | 2.2                    | 7                                      | 0.31                                      | 0.0625    |
|                          |        | <=1              | 2                      | 8                                      | 0.25                                      | 0.0625    |
| <=1                      | 2.9    | 10.5             | 0.28                   | 0.0625                                 |                                           |           |

231  
 232  
 233  
 234

**Table S3: Emissions [add caption]**

| Scenario | Timescale | Emissions |      |              |      |             |      |              |      |
|----------|-----------|-----------|------|--------------|------|-------------|------|--------------|------|
|          |           | Total     |      | Gradual thaw |      | Abrupt thaw |      | Fire-related |      |
|          |           | Gt CO2e   | Pg C | Gt CO2e      | Pg C | Gt CO2e     | Pg C | Gt CO2e      | Pg C |
| SSP1-2.6 | 2050      | 107       | 18   | 33           | 7    | 31          | 2    | 43           | 9    |
| SSP2-4.5 |           | 113       | 19   | 37           | 7    | 33          | 2    | 44           | 9    |
| SSP3-6.0 |           | 117       | 19   | 38           | 8    | 33          | 3    | 45           | 9    |
| SSP5-8.5 |           | 135       | 22   | 48           | 9    | 37          | 3    | 50           | 10   |
| SSP1-2.6 |           | 374       | 48   | 98           | 17   | 129         | 7    | 147          | 23   |
| SSP2-4.5 | 2100      | 536       | 70   | 179          | 30   | 169         | 10   | 188          | 31   |
| SSP3-6.0 |           | 607       | 81   | 221          | 37   | 182         | 10   | 204          | 33   |
| SSP5-8.5 |           | 1003      | 138  | 504          | 79   | 224         | 13   | 275          | 46   |

235  
 236  
 237  
 238  
 239

**Table S4:** Detailed carbon budget estimates in Gt CO<sub>2</sub>e. An asterisk (\*) means no budget could be estimated for this combination of temperature goal and future climate scenario. Permafrost and wildfire representation indicates which permafrost thaw and wildfire processes

240 are 'switched on'; A = gradual thaw only; B = gradual and abrupt thaw; C = gradual and abrupt  
 241 thaw, and below-ground combustion; D = all processes.

| Exceedance budgets (Gt CO <sub>2</sub> e) |                                                      |             |             |             |             |
|-------------------------------------------|------------------------------------------------------|-------------|-------------|-------------|-------------|
| 1.5°C                                     |                                                      |             |             |             |             |
| LSM                                       | Permafrost and high-latitude wildfire representation | SSP5-RCP8.5 | SSP4-RCP6.0 | SSP2-RCP4.5 | SSP1-RCP2.6 |
| JSBACH                                    | A                                                    | 465         | 539         | 582         | 625         |
| JSBACH                                    | B                                                    | 458         | 531         | 571         | 604         |
| JSBACH                                    | C                                                    | 452         | 525         | 562         | 588         |
| JSBACH                                    | D                                                    | 449         | 521         | 557         | 579         |
| JULES-SuppressResp                        | A                                                    | 481         | 556         | 606         | 675         |
| JULES-SuppressResp                        | B                                                    | 474         | 548         | 594         | 650         |
| JULES-SuppressResp                        | C                                                    | 468         | 541         | 585         | 632         |
| JULES-SuppressResp                        | D                                                    | 467         | 540         | 583         | 627         |
| JULES-DeepResp                            | A                                                    | 477         | 550         | 598         | 658         |
| JULES-DeepResp                            | B                                                    | 470         | 542         | 586         | 635         |
| JULES-DeepResp                            | C                                                    | 464         | 536         | 577         | 617         |
| JULES-DeepResp                            | D                                                    | 463         | 534         | 575         | 613         |
| ORCHIDEE-MICT                             | A                                                    | 479         | 553         | 601         | 666         |
| ORCHIDEE-MICT                             | B                                                    | 472         | 545         | 590         | 642         |
| ORCHIDEE-MICT                             | C                                                    | 467         | 538         | 581         | 624         |
| ORCHIDEE-MICT                             | D                                                    | 465         | 537         | 579         | 619         |

242

| Exceedance budgets (Gt CO <sub>2</sub> e) |                                                      |             |             |             |             |
|-------------------------------------------|------------------------------------------------------|-------------|-------------|-------------|-------------|
| 2.0°C                                     |                                                      |             |             |             |             |
| LSM                                       | Permafrost and high-latitude wildfire representation | SSP5-RCP8.5 | SSP4-RCP6.0 | SSP2-RCP4.5 | SSP1-RCP2.6 |
| JSBACH                                    | A                                                    | 1388        | 1522        | 1693        | *           |
| JSBACH                                    | B                                                    | 1369        | 1500        | 1655        | *           |
| JSBACH                                    | C                                                    | 1355        | 1481        | 1626        | *           |
| JSBACH                                    | D                                                    | 1351        | 1477        | 1617        | *           |
| JULES-SuppressResp                        | A                                                    | 1399        | 1537        | 1716        | *           |
| JULES-SuppressResp                        | B                                                    | 1379        | 1514        | 1677        | *           |
| JULES-SuppressResp                        | C                                                    | 1365        | 1496        | 1647        | *           |
| JULES-SuppressResp                        | D                                                    | 1361        | 1491        | 1637        | *           |
| JULES-DeepResp                            | A                                                    | 1383        | 1516        | 1683        | *           |
| JULES-DeepResp                            | B                                                    | 1364        | 1494        | 1645        | *           |
| JULES-DeepResp                            | C                                                    | 1349        | 1476        | 1616        | *           |
| JULES-DeepResp                            | D                                                    | 1346        | 1471        | 1608        | *           |
| ORCHIDEE-MICT                             | A                                                    | 1388        | 1522        | 1693        | *           |
| ORCHIDEE-MICT                             | B                                                    | 1369        | 1500        | 1655        | *           |
| ORCHIDEE-MICT                             | C                                                    | 1355        | 1481        | 1626        | *           |
| ORCHIDEE-MICT                             | D                                                    | 1351        | 1477        | 1617        | *           |

243

| Avoidance budgets (Gt CO <sub>2</sub> e)<br>1.5°C |                                                         |                 |                 |                 |                 |
|---------------------------------------------------|---------------------------------------------------------|-----------------|-----------------|-----------------|-----------------|
| LSM                                               | Permafrost and high-latitude<br>wildfire representation | SSP1-<br>RCP2.6 | SSP2-<br>RCP4.5 | SSP4-<br>RCP6.0 | SSP5-<br>RCP8.5 |
| JSBACH                                            | A                                                       | 1230            | 853             | 562             | 324             |
| JSBACH                                            | B                                                       | 1183            | 816             | 535             | 312             |
| JSBACH                                            | C                                                       | 1143            | 774             | 506             | 307             |
| JSBACH                                            | D                                                       | 1111            | 739             | 494             | 296             |
| JULES-SuppressResp                                | A                                                       | 1275            | 913             | 618             | 352             |
| JULES-SuppressResp                                | B                                                       | 1244            | 876             | 591             | 338             |
| JULES-SuppressResp                                | C                                                       | 1213            | 841             | 555             | 323             |
| JULES-SuppressResp                                | D                                                       | 1195            | 825             | 547             | 318             |
| JULES-DeepResp                                    | A                                                       | 1257            | 880             | 588             | 340             |
| JULES-DeepResp                                    | B                                                       | 1212            | 844             | 563             | 330             |
| JULES-DeepResp                                    | C                                                       | 1184            | 810             | 534             | 314             |
| JULES-DeepResp                                    | D                                                       | 1180            | 797             | 528             | 314             |
| ORCHIDEE-MICT                                     | A                                                       | 1264            | 898             | 603             | 345             |
| ORCHIDEE-MICT                                     | B                                                       | 1228            | 860             | 576             | 334             |
| ORCHIDEE-MICT                                     | C                                                       | 1196            | 824             | 543             | 317             |
| ORCHIDEE-MICT                                     | D                                                       | 1177            | 812             | 537             | 315             |

244

| Avoidance budgets (Gt CO <sub>2</sub> e)<br>2.0°C |                                                         |                 |                 |                 |                 |
|---------------------------------------------------|---------------------------------------------------------|-----------------|-----------------|-----------------|-----------------|
| LSM                                               | Permafrost and high-latitude<br>wildfire representation | SSP1-<br>RCP2.6 | SSP2-<br>RCP4.5 | SSP4-<br>RCP6.0 | SSP5-<br>RCP8.5 |
| JSBACH                                            | A                                                       | 2011            | 1843            | 1557            | 1161            |
| JSBACH                                            | B                                                       | 1981            | 1811            | 1493            | 1117            |
| JSBACH                                            | C                                                       | 1942            | 1752            | 1437            | 1052            |
| JSBACH                                            | D                                                       | 1919            | 1700            | 1417            | 1017            |
| JULES-SuppressResp                                | A                                                       | 2082            | 1950            | 1667            | 1278            |
| JULES-SuppressResp                                | B                                                       | 2058            | 1890            | 1612            | 1222            |
| JULES-SuppressResp                                | C                                                       | 2015            | 1841            | 1552            | 1166            |
| JULES-SuppressResp                                | D                                                       | 2008            | 1837            | 1530            | 1144            |
| JULES-DeepResp                                    | A                                                       | 2062            | 1892            | 1609            | 1227            |
| JULES-DeepResp                                    | B                                                       | 2020            | 1850            | 1561            | 1172            |
| JULES-DeepResp                                    | C                                                       | 1999            | 1818            | 1490            | 1110            |
| JULES-DeepResp                                    | D                                                       | 1991            | 1809            | 1484            | 1088            |
| ORCHIDEE-MICT                                     | A                                                       | 2072            | 1924            | 1632            | 1241            |
| ORCHIDEE-MICT                                     | B                                                       | 2035            | 1877            | 1591            | 1189            |
| ORCHIDEE-MICT                                     | C                                                       | 2011            | 1831            | 1516            | 1132            |
| ORCHIDEE-MICT                                     | D                                                       | 2005            | 1815            | 1507            | 1114            |

245

246
